# Supplementary material for: Robust Detection and Genotyping of Single Feature Polymorphisms from Gene Expression Data
Source: PLoS Comput Biol. 2009 Mar 13;5(3):e1000317. doi: 10.1371/journal.pcbi.1000317 (PMC2649212; doi:10.1371/journal.pcbi.1000317)
Supplement: Table S1 — The number of SFPs called at different values of the stringency parameter delta by Method 6 (Rostoks et al 2005, Genome Biology 6, R54) (0.03 MB XLS) [file pcbi.1000317.s003.xls]

## Sheet: Sheet1
Table S1. The number of SFPs called at different values of the stringency parameter delta by Method 6 (Rostoks et al 2005, Genome Biology 6, R54)
			Yeast	DNA
#	Delta	p0	FALSE	Called	FDR	cutlow	cutup	j2	j1
#1	0.5	0.95	20139.6	43078	0.4441	-1.085	0.651	15944	35677
#2	1	0.95	4719.14	31430	0.1426	-1.862	1.37	10226	41607
#3	1.5	0.95	1229.39	24777	0.0471	-2.514	2.035	7681	45715
#4	2	0.95	666.043	20293	0.0312	-3.112	2.672	6283	48801
#5	2.5	0.95	502.6	17197	0.0278	-3.677	3.283	5484	51098
#6	3	0.95	423.1	14927	0.0269	-4.225	3.877	4974	52858
#7	3.5	0.95	369.086	13067	0.0268	-4.762	4.465	4613	54357
#8	4	0.95	325.357	11553	0.0268	-5.295	5.045	4345	55603
#9	4.5	0.95	288.7	10218	0.0268	-5.824	5.623	4086	56679
#10	5	0.95	258.886	9125	0.027	-6.353	6.198	3879	57565
#11	5.5	0.95	232.943	8192	0.027	-6.882	6.772	3674	58293
#12	6	0.95	209.671	7359	0.0271	-7.41	7.349	3461	58913
#13	6.5	0.95	189.4	6634	0.0271	-7.943	7.923	3261	59438
#14	7	0.95	171.371	5995	0.0272	-8.475	8.494	3072	59888
#15	7.5	0.95	154.857	5412	0.0272	-9.003	9.066	2889	60288
#16	8	0.95	140.914	4926	0.0272	-9.535	9.626	2715	60600
#17	8.5	0.95	128.886	4511	0.0271	-10.064	10.182	2547	60847
#18	9	0.95	117.229	4098	0.0272	-10.592	10.743	2377	61090
#19	9.5	0.95	106.7	3736	0.0271	-11.13	11.301	2198	61273
#20	10	0.95	96.486	3378	0.0271	-11.678	11.852	2025	61458
#
			Yeast	RNA
#	Delta	p0	FALSE	Called	FDR	cutlow	cutup	j2	j1
#1	0.5	0.95	1935.39	9518	0.1932	-1.286	1.216	4239	57532
#2	1	0.95	225.314	4322	0.0495	-1.869	2.188	3260	61749
#3	1.5	0.95	95.014	2989	0.0302	-2.436	2.956	2624	62446
#4	2	0.95	63.114	2322	0.0258	-2.998	3.637	2141	62630
#5	2.5	0.95	46.714	1814	0.0245	-3.559	4.303	1716	62713
#6	3	0.95	35.1	1399	0.0238	-4.126	4.972	1346	62758
#7	3.5	0.95	26.771	1101	0.0231	-4.685	5.619	1069	62779
#8	4	0.95	20.186	861	0.0223	-5.248	6.301	841	62791
#9	4.5	0.95	15.3	666	0.0218	-5.811	6.943	652	62797
#10	5	0.95	11.486	510	0.0214	-6.381	7.513	499	62800
#11	5.5	0.95	8.843	386	0.0218	-6.948	8.132	378	62803
#12	6	0.95	6.643	282	0.0224	-7.534	8.583	275	62804
#13	6.5	0.95	4.271	223	0.0182	-8.116	10.81	221	62809
#14	7	0.95	3.471	170	0.0194	-8.665	10.81	168	62809
#15	7.5	0.95	3	140	0.0204	-9.232	10.81	138	62809
#16	8	0.95	1.586	108	0.0139	-9.779	17.789	107	62810
#17	8.5	0.95	1.243	84	0.0141	-10.42	17.789	83	62810
#18	9	0.95	0.957	65	0.014	-10.927	17.789	64	62810
#19	9.5	0.95	0.586	39	0.0143	-11.583	17.789	38	62810
#20	10	0.95	0.443	29	0.0145	-12.138	17.789	28	62810
			Barley	RNA
#	Delta	p0	FALSE	Called	FDR	cutlow	cutup	j2	j1
#1	0.5	0.95	4443.95	18457	0.2287	-1.578	1.591	9393	241748
#2	1	0.95	1336.95	10707	0.1186	-2.265	2.339	5822	245927
#3	1.5	0.95	776.1	7371	0.1	-2.91	3.034	4170	247611
#4	2	0.95	554.6	5481	0.0961	-3.531	3.707	3224	248555
#5	2.5	0.95	429.2	4297	0.0949	-4.141	4.346	2571	249086
#6	3	0.95	328.6	3294	0.0948	-4.756	5.01	2060	249578
#7	3.5	0.95	248.95	2509	0.0943	-5.38	5.671	1612	249915
#8	4	0.95	188.6	1899	0.0943	-6.004	6.337	1247	250160
#9	4.5	0.95	141.5	1429	0.0941	-6.634	7	968	250351
#10	5	0.95	105.35	1075	0.0931	-7.252	7.702	766	250503
